# Supplementary material for: New Aspects of Ruthenium-Mediated Polyhedral Contraction of Monocarbollides
Source: MDPI journal article supplement (doi:10.3390/inorganics10100158), 2022-09-28

## checkCIF/PLATON report

Structure factors have been supplied for datablock(s) igrum

THIS REPORT IS FOR GUIDANCE ONLY. IF USED AS PART OF A REVIEW PROCEDURE FOR PUBLICATION, IT SHOULD NOT REPLACE THE EXPERTISE OF AN EXPERIENCED CRYSTALLOGRAPHIC REFEREE.

No syntax errors found.      CIF dictionary      Interpreting this report

### Datablock: igrum

---

Bond precision:      C-C = 0.0057 Å      Wavelength=0.71073

Cell:                      a=10.560(2)                      b=20.205(4)                      c=22.352(4)  
                             alpha=114.814(4)                      beta=101.570(4)                      gamma=90.753(4)  
Temperature:      120 K

|                        | Calculated             | Reported               |
|------------------------|------------------------|------------------------|
| Volume                 | 4215.4(14)             | 4215.4(14)             |
| Space group            | P -1                   | P -1                   |
| Hall group             | -P 1                   | -P 1                   |
| Moiety formula         | C44 H45 B8 Cl O P2 Ru2 | ?                      |
| Sum formula            | C44 H45 B8 Cl O P2 Ru2 | C44 H45 B8 Cl O P2 Ru2 |
| Mr                     | 975.81                 | 975.81                 |
| Dx, g cm <sup>-3</sup> | 1.538                  | 1.538                  |
| Z                      | 4                      | 4                      |
| Mu (mm <sup>-1</sup> ) | 0.892                  | 0.892                  |
| F000                   | 1968.0                 | 1968.0                 |
| F000'                  | 1959.78                |                        |
| h, k, lmax             | 14, 27, 30             | 14, 27, 30             |
| Nref                   | 22432                  | 22374                  |
| Tmin, Tmax             | 0.717, 0.852           | 0.659, 0.862           |
| Tmin'                  | 0.657                  |                        |

Correction method= # Reported T Limits: Tmin=0.659 Tmax=0.862  
AbsCorr = MULTI-SCAN

Data completeness= 0.997      Theta(max)= 29.000

|                                |                   |
|--------------------------------|-------------------|
| R(reflections)= 0.0462( 15232) | wR2(reflections)= |
| S = 1.075                      | 0.1000( 22374)    |
| Npar= 1102                     |                   |

---

The following ALERTS were generated. Each ALERT has the format

**test-name\_ALERT\_alert-type\_alert-level.**

Click on the hyperlinks for more details of the test.

---

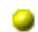

### Alert level C

|                   |                                                  |        |        |
|-------------------|--------------------------------------------------|--------|--------|
| PLAT094_ALERT_2_C | Ratio of Maximum / Minimum Residual Density .... | 2.79   | Report |
| PLAT222_ALERT_3_C | NonSolvent Resd 1 H Uiso(max)/Uiso(min) Range    | 8.0    | Ratio  |
| PLAT222_ALERT_3_C | NonSolvent Resd 2 H Uiso(max)/Uiso(min) Range    | 4.6    | Ratio  |
| PLAT245_ALERT_2_C | U(iso) H3A Smaller than U(eq) B3A by             | 0.014  | Ang**2 |
| PLAT245_ALERT_2_C | U(iso) H4A Smaller than U(eq) B4A by             | 0.017  | Ang**2 |
| PLAT245_ALERT_2_C | U(iso) H10B Smaller than U(eq) B10B by           | 0.014  | Ang**2 |
| PLAT330_ALERT_2_C | Large Aver Phenyl C-C Dist C18A --C23A .         | 1.41   | Ang.   |
| PLAT330_ALERT_2_C | Large Aver Phenyl C-C Dist C18B --C23B .         | 1.42   | Ang.   |
| PLAT905_ALERT_3_C | Negative K value in the Analysis of Variance ... | -0.188 | Report |
| PLAT971_ALERT_2_C | Check Calcd Resid. Dens. 0.87Ang From Ru2A       | 1.57   | eA-3   |
| PLAT973_ALERT_2_C | Check Calcd Positive Resid. Density on Ru1A      | 1.42   | eA-3   |
| PLAT973_ALERT_2_C | Check Calcd Positive Resid. Density on Ru1B      | 1.41   | eA-3   |
| PLAT973_ALERT_2_C | Check Calcd Positive Resid. Density on Ru2A      | 1.37   | eA-3   |
| PLAT973_ALERT_2_C | Check Calcd Positive Resid. Density on Ru2B      | 1.36   | eA-3   |

---

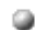

### Alert level G

|                   |                                                  |       |              |
|-------------------|--------------------------------------------------|-------|--------------|
| PLAT154_ALERT_1_G | The s.u.'s on the Cell Angles are Equal ..(Note) | 0.004 | Degree       |
| PLAT303_ALERT_2_G | Full Occupancy Atom H5A with # Connections       | 2.00  | Check        |
| PLAT303_ALERT_2_G | Full Occupancy Atom H9A with # Connections       | 2.00  | Check        |
| PLAT303_ALERT_2_G | Full Occupancy Atom H5B with # Connections       | 2.00  | Check        |
| PLAT303_ALERT_2_G | Full Occupancy Atom H9B with # Connections       | 2.00  | Check        |
| PLAT343_ALERT_2_G | Unusual Angle Range in Main Residue for C1A      |       | Check        |
| PLAT343_ALERT_2_G | Unusual Angle Range in Main Residue for C1B      |       | Check        |
| PLAT779_ALERT_4_G | Suspect or Irrelevant (Bond) Angle(s) in CIF ... | 42.00 | Deg.         |
|                   | RU1B -B9B -H9B 1_555 1_555 1_555 ..... #         | 627   | Check        |
| PLAT910_ALERT_3_G | Missing # of FCF Reflection(s) Below Theta(Min). | 3     | Note         |
| PLAT912_ALERT_4_G | Missing # of FCF Reflections Above STh/L= 0.600  | 55    | Note         |
| PLAT933_ALERT_2_G | Number of HKL-OMIT Records in Embedded .res File | 4     | Note         |
| PLAT941_ALERT_3_G | Average HKL Measurement Multiplicity .....       | 2.4   | Low          |
| PLAT965_ALERT_2_G | The SHELXL WEIGHT Optimisation has not Converged |       | Please Check |
| PLAT967_ALERT_5_G | Note: Two-Theta Cutoff Value in Embedded .res .. | 58.0  | Degree       |
| PLAT978_ALERT_2_G | Number C-C Bonds with Positive Residual Density. | 0     | Info         |

---

0 **ALERT level A** = Most likely a serious problem - resolve or explain

0 **ALERT level B** = A potentially serious problem, consider carefully

14 **ALERT level C** = Check. Ensure it is not caused by an omission or oversight

15 **ALERT level G** = General information/check it is not something unexpected

1 ALERT type 1 CIF construction/syntax error, inconsistent or missing data

20 ALERT type 2 Indicator that the structure model may be wrong or deficient

5 ALERT type 3 Indicator that the structure quality may be low

2 ALERT type 4 Improvement, methodology, query or suggestion

1 ALERT type 5 Informative message, check

---

It is advisable to attempt to resolve as many as possible of the alerts in all categories. Often the minor alerts point to easily fixed oversights, errors and omissions in your CIF or refinement strategy, so attention to these fine details can be worthwhile. In order to resolve some of the more serious problems it may be necessary to carry out additional measurements or structure refinements. However, the purpose of your study may justify the reported deviations and the more serious of these should normally be commented upon in the discussion or experimental section of a paper or in the "special\_details" fields of the CIF. checkCIF was carefully designed to identify outliers and unusual parameters, but every test has its limitations and alerts that are not important in a particular case may appear. Conversely, the absence of alerts does not guarantee there are no aspects of the results needing attention. It is up to the individual to critically assess their own results and, if necessary, seek expert advice.

### **Publication of your CIF in IUCr journals**

A basic structural check has been run on your CIF. These basic checks will be run on all CIFs submitted for publication in IUCr journals (*Acta Crystallographica*, *Journal of Applied Crystallography*, *Journal of Synchrotron Radiation*); however, if you intend to submit to *Acta Crystallographica Section C* or *E* or *IUCrData*, you should make sure that full publication checks are run on the final version of your CIF prior to submission.

### **Publication of your CIF in other journals**

Please refer to the *Notes for Authors* of the relevant journal for any special instructions relating to CIF submission.

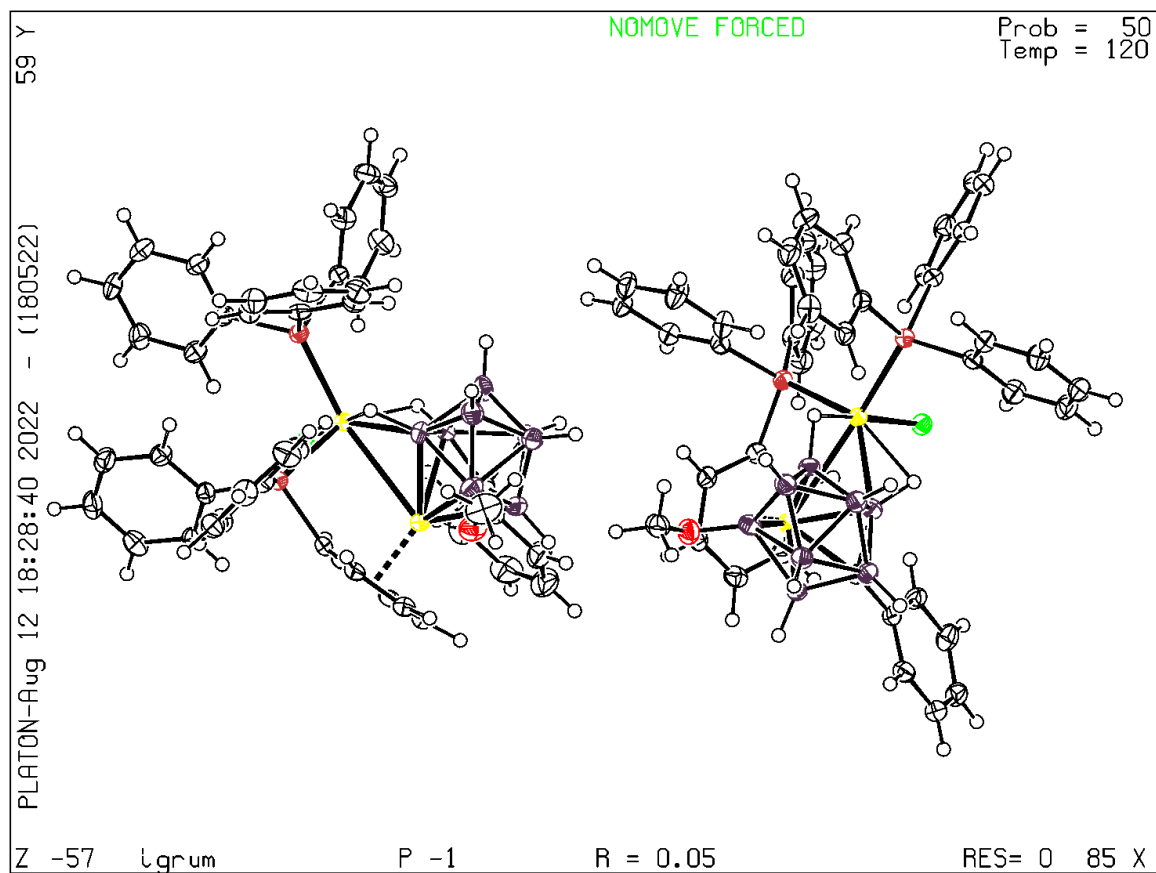

Supplement: s1 [file s1]
